# Supplementary material for: Automated MRI Lung Segmentation and 3D Morphological Features for Quantification of Neonatal Lung Disease
Source: bioRxiv or medRxiv preprint supplement (doi:10.1101/2021.08.06.21261648), 2022-07-15
Supplement: Supplementary file [file media-4.pdf]

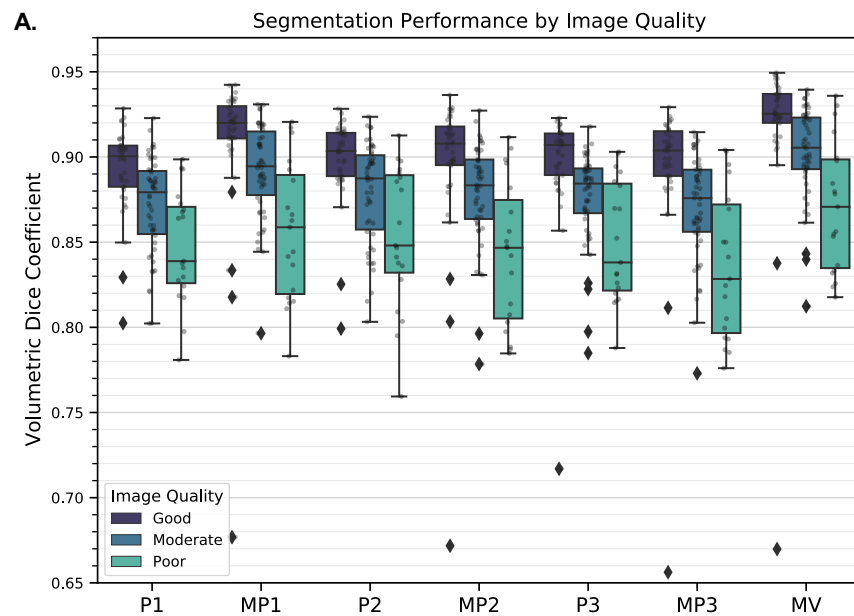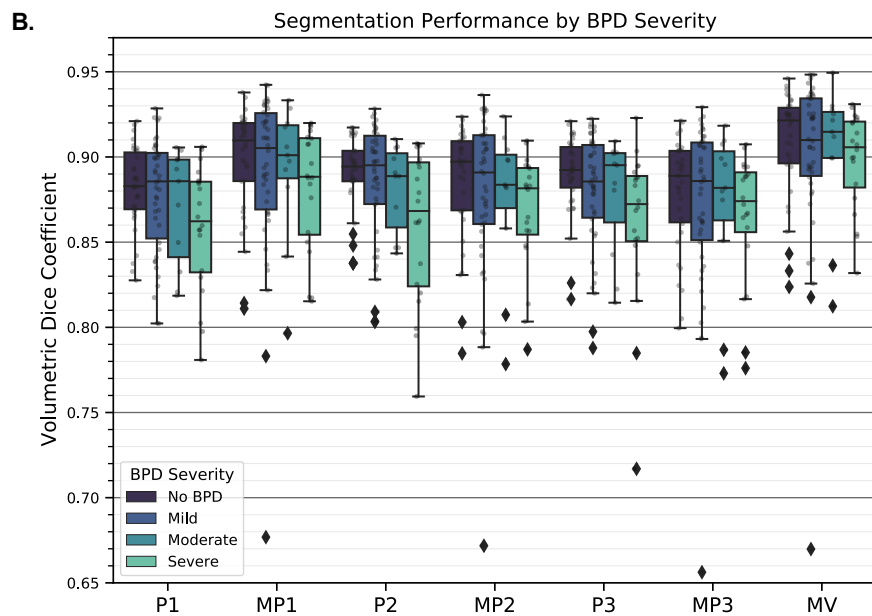

**Figure S1. Lung Segmentation Performance by Image Quality and BPD Severity.** (A) Lung segmentation performances for physician-based lung annotations (P1, P2, P3), U-Net models (MP1, MP2, MP3) and ensemble model with majority voting (MV), results discriminated by image quality. (B) Lung segmentation performances discriminated by BPD severity.
